# Supplementary material for: DNA-modulated single-atom nanozymes with enhanced enzyme-like activity for ultrasensitive detection of dopamine
Source: Royal Society of Chemistry journal article supplement (doi:10.1039/d3nr01737k), 2023-01-01
Supplement: d3nr01737k1.pdf [file d3nr01737k1.pdf]

Supporting Information for  
**DNA-Modulated Single-atom Nanozyme with Enhanced  
Enzyme-Like Activity for Ultrasensitive Detection of Dopamine**

*Zhihan Wu,<sup>a</sup> Wendong Liu,<sup>a</sup> Haijun Lu,<sup>a</sup> Hongyan Zhang,<sup>a</sup> Zhe Hao,<sup>a</sup> Fanghua  
Zhang,<sup>a</sup> Ruizhong Zhang,<sup>\*a</sup> Xiyang Li<sup>\*b</sup> and Libing Zhang<sup>\*a</sup>*

<sup>a</sup> Tianjin Key Laboratory of Molecular Optoelectronic Sciences, Department of Chemistry, Tianjin University, Tianjin 300072 P. R. China

E-mail: libing.zhang@tju.edu.cn (L.Z.); zhangrz2019@tju.edu.cn

<sup>b</sup> Institute of Photoelectronic Thin Film Devices and Technology, Solar Energy Conversion Center, Key Laboratory of Photoelectronic Thin Film Devices and Technology of Tianjin, Engineering Research Center of Thin Film Photoelectronic Technology of Ministry of Education, Nankai University, Tianjin 300350 P. R. China

\*Corresponding author.

E-mail: xiyang.li@nankai.edu.cn

## Materials and methods

### Chemical and materials.

All oligonucleotide sequences were synthesized by Sangon Biotechnology Co. Ltd. (Shanghai, China) and shown in Table S1. All sequences were rapidly denatured at 95°C for 5 min and then cooled to room temperature for the following studies. Zinc nitrate hexahydrate ( $\text{Zn}(\text{NO}_3)_2 \cdot 6\text{H}_2\text{O}$ ), Hemin (95%), 2-methylimidazole (2-MI, 98%), 3,3',5,5'-tetramethylbenzidine (TMB), hydrogen peroxide ( $\text{H}_2\text{O}_2$ , 30%), 2,2'-azinobis (3-ethylbenzothiazoline-6-sulfonic acid) diammonium salt (ABTS), ascorbic acid, *L*-cysteine, *L*-phenylalanine were purchased from Aladdin (Shanghai, China). DA and *L*-tyrosine were purchased from Meryer (Shanghai, China). Glutathione, glucose, lactose, and uric acid were purchased from Energy Chemical (Shanghai, China). All reagents were used directly without further purification. Ultrapure water ( $\geq 18 \text{ M}\Omega$ , Millipore) was used in the whole experiment.

### Apparatus and characterization.

Transmission electron microscopy (TEM) images and element mappings were gained from a JEM-2100F with an accelerating voltage of 200 kV. Scanning electron microscope (SEM) images were performed on a TESCAN MIRA LMS (Czech). X-ray photoelectron spectroscopy (XPS) measurement was performed on a Thermo Scientific K-Alpha with Al K $\alpha$  X-ray radiation as the X-ray source for excitation. The crystal structure of samples was identified by X-ray diffractometer (XRD) using Cu K $\alpha$  radiation (Rigaku SmartLab SE, Japan). Zeta potential of the materials was measured on a nano-particle size and Zeta potential analyzer (Zetasizer nano ZS90, Malvern Panalytical). Ultraviolet-visible (UV-vis) absorption spectra was collected on a UV-vis-NIR spectrophotometer (UV-3600 Plus, Shimadzu, Japan). Fluorescence analysis was carried out on a FS05 steady-state transient fluorescence spectrometer (Thermo Field, USA).

### Synthesis of N-C

The synthetic route of N-C is similar to that of Fe-N-C, except that hemin is not added in the first step to obtain ZIF-8.

### **Kinetic measurements.**

The steady-state kinetic analysis was carried out using 0.5  $\mu\text{g mL}^{-1}$  Fe-N-C or DNA/Fe-N-C in reaction volume of acetate buffer (20 mM, pH 4.0) at room temperature with diverse concentrations of  $\text{H}_2\text{O}_2$  (TMB) and 0.5 mM TMB (5 mM  $\text{H}_2\text{O}_2$ ). According to the typical Michaelis-Menten equation:  $v = V_{\text{max}} [C] / (K_M + [C])$ , where  $v$  is the initial velocity,  $V_{\text{max}}$  is the maximal reaction velocity,  $[C]$  is the concentration of substrate (TMB or  $\text{H}_2\text{O}_2$ ), and  $K_M$  is Michaelis constant.

### **Selectivity analyses of DNA/Fe-N-C for dopamine (DA).**

To verify the selectivity of the DNA/Fe-N-C-based sensing platform for DA, various amino acids and small molecules such as cysteine, phenylalanine, tyrosine, uric acid, lactose, glucose, glutathione, ascorbic acid were similarly tested replaced with 40  $\mu\text{M}$  of DA.

### **Detection of $\cdot\text{OH}$**

Typically, Fe-N-C or DNA/Fe-N-C solution (10  $\mu\text{g mL}^{-1}$ ), terephthalic acid (TA) solution (0.5 mM) and  $\text{H}_2\text{O}_2$  solution (10 mM) were mixed in acetate buffer (pH 4.0, 20 mM) until the final volume reached 1 mL. After incubating for 3 h, the solutions were used for the detection of  $\cdot\text{OH}$ .

## Supporting tables and figures

**Table S1** Sequences of synthesized DNA

| Name              | Sequences (5'-3')                               |
|-------------------|-------------------------------------------------|
| G <sub>14</sub>   | GGGGGGGGGGGGGGG                                 |
| T <sub>14</sub>   | TTTTTTTTTTTTTTT                                 |
| C <sub>14</sub>   | CCCCCCCCCCCCCC                                  |
| A <sub>14</sub>   | AAAAAAAAAAAAAAAA                                |
| A <sub>20</sub>   | AAAAAAAAAAAAAAAAAAAA                            |
| A <sub>30</sub>   | AAAAAAAAAAAAAAAAAAAAAAAAAAAA                    |
| A <sub>40</sub>   | AAAAAAAAAAAAAAAAAAAAAAAAAAAAAAAAAAAA            |
| Random<br>DNA     | TACCCTGTAGAACCGAATTTGTG                         |
| Random<br>FAM-DNA | TACCCTGTAGAACCGAATTTGTG, FAM at the 5' terminus |

**Table S2** Comparison of the apparent Michaelis-Menten constant ( $K_M$ ) and maximum reaction rate ( $V_{\max}$ ) of the catalytic reactions.

| Catalyst   | Substrate                     | $K_M$ (mM) | $V_{\max}$ ( $10^{-8}$ M s $^{-1}$ ) | References |
|------------|-------------------------------|------------|--------------------------------------|------------|
| Fe-N-C     | TMB                           | 0.15       | 8.20                                 | This work  |
|            | H <sub>2</sub> O <sub>2</sub> | 1.60       | 7.61                                 |            |
| DNA/Fe-N-C | TMB                           | 0.08       | 7.75                                 | This work  |
|            | H <sub>2</sub> O <sub>2</sub> | 3.03       | 11.69                                |            |
| HRP        | TMB                           | 0.43       | 10.00                                | 1          |
|            | H <sub>2</sub> O <sub>2</sub> | 3.70       | 8.70                                 |            |

**Table S3** Comparison of different methods for DA detection.

| Methods          | Materials                                                                       | Linear range<br>( $\mu\text{M}$ ) | LOD<br>(nM) | References |
|------------------|---------------------------------------------------------------------------------|-----------------------------------|-------------|------------|
| Fluorescence     | GNC-Ce <sup>3+</sup>                                                            | 0.1-1000                          | 10.85       | 2          |
| Fluorescence     | BSA-CuNCs                                                                       | 0.50-50                           | 280         | 3          |
| ECL              | CdSeTe/ZnS QDs                                                                  | 3.75-450                          | 100         | 4          |
| Electrochemistry | CAuNE                                                                           | 1-100                             | 5830        | 5          |
| Colorimetric     | CuFe <sub>2</sub> O <sub>4</sub> /Cu <sub>9</sub> S <sub>8</sub> / PPy<br>h-CuS | 2-20                              | 1000        | 6          |
| Colorimetric     | Bi <sub>2</sub> Fe <sub>4</sub> O <sub>9</sub>                                  | 0.15-50                           | 50          | 7          |
| Colorimetric     | Pt/hBNNSs-5                                                                     | 2-55                              | 760         | 8          |
| Colorimetric     | h-CuS NCs                                                                       | 2-150                             | 1670        | 9          |
| Colorimetric     | CGNPs                                                                           | 1-20                              | 1150        | 10         |
| Colorimetric     | FeN <sub>3</sub> -PtN <sub>4</sub> -SAzyme                                      | 1-10                              | 109         | 11         |
| Colorimetric     | Fe-N-C                                                                          | 5-100                             | 4170        | This work  |
| Colorimetric     | DNA/Fe-N-C                                                                      | 0.01-4<br>5-100                   | 9.56        | This work  |

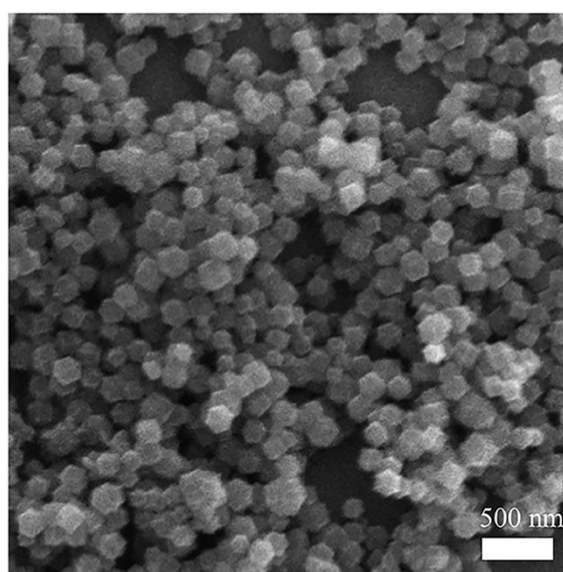

**Fig. S1** SEM image of Fe-N-C.

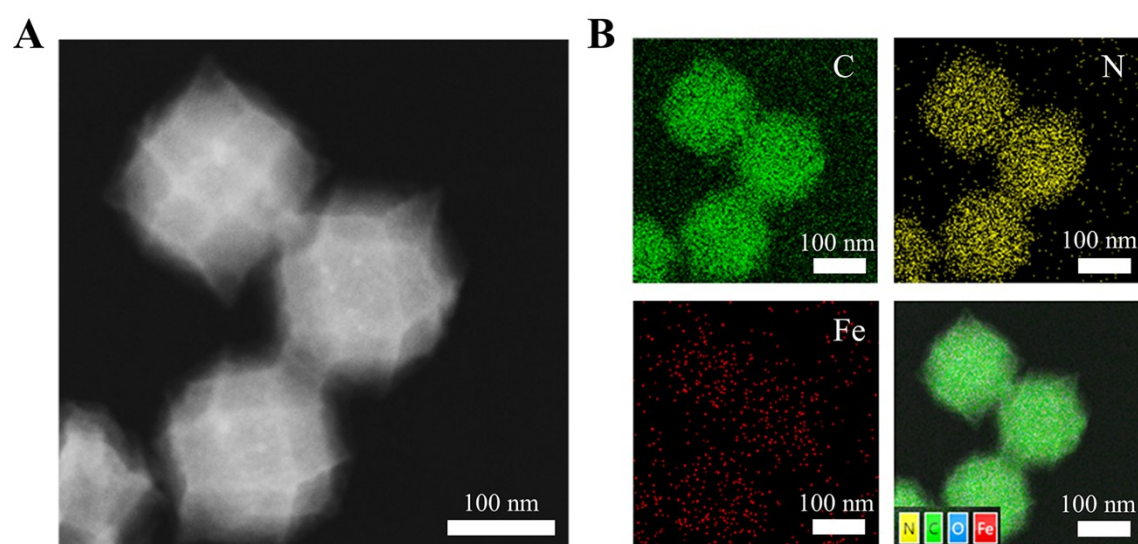

**Fig. S2** (A) HAADF-STEM image of Fe-N-C. (B) the elemental mapping images of C (green), N (yellow), Fe (red) and their overlapping image.

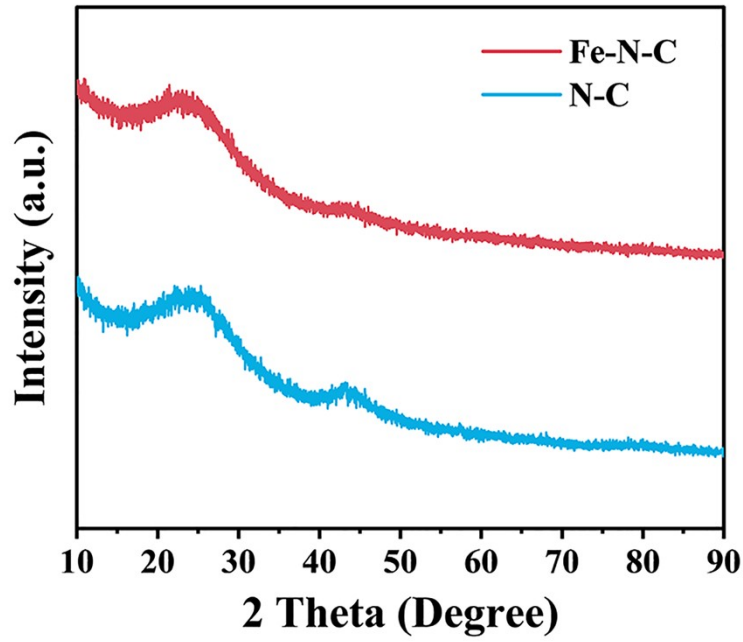

Fig. S3 XRD pattern of N-C and Fe-N-C.

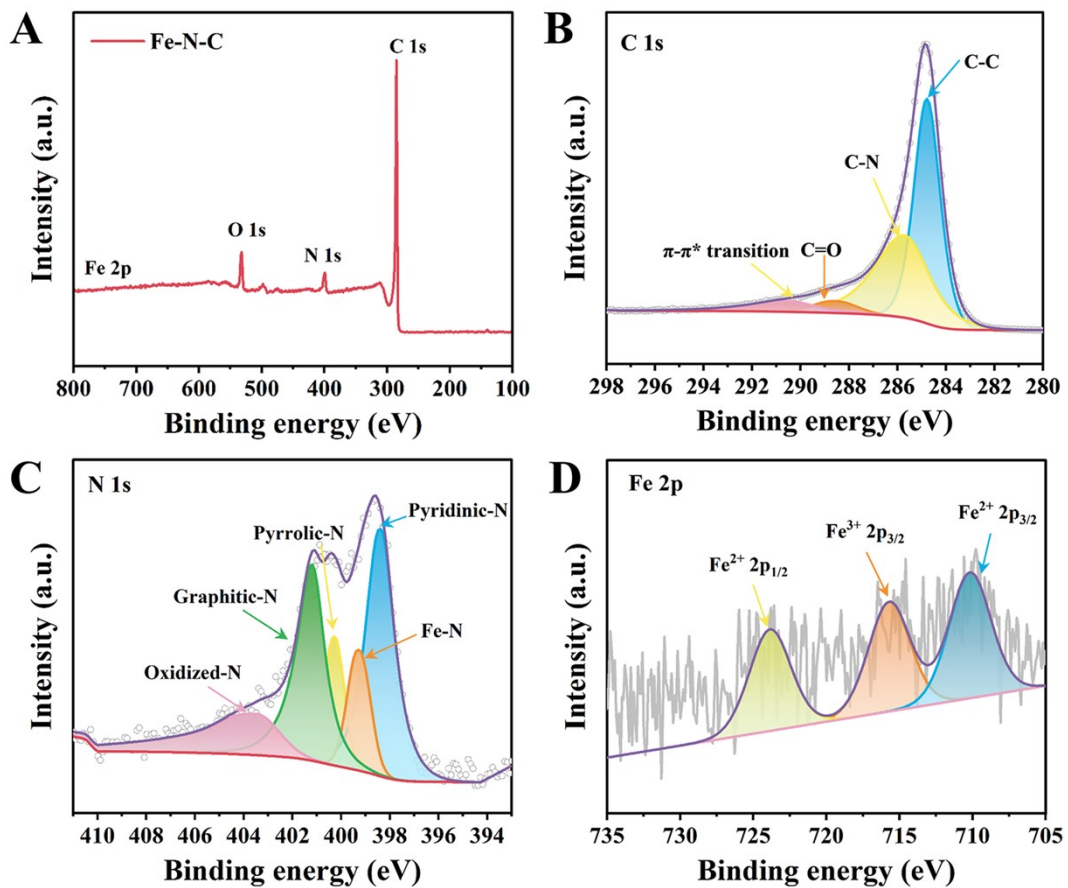

Fig. S4 (A) XPS survey spectrum of Fe-N-C. (B) High-resolution XPS spectra of C 1s, (C) N 1s, and (D) Fe 2p.



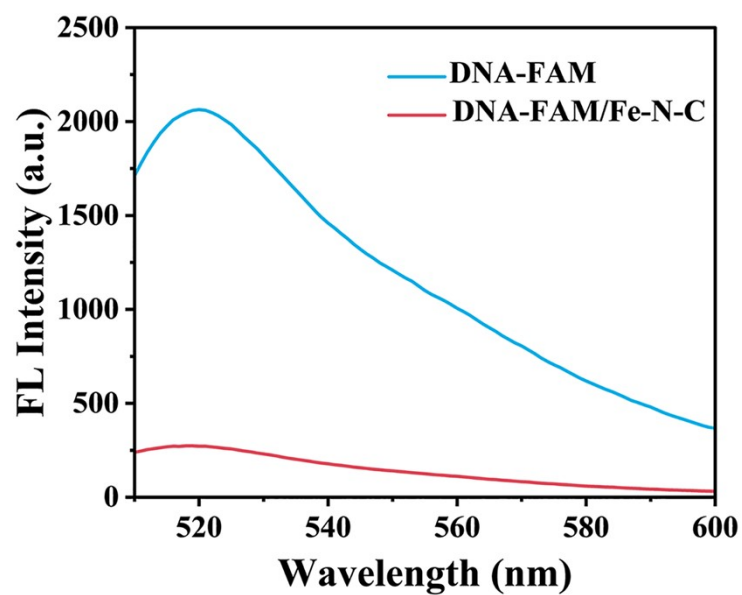

**Fig. S5** Fluorescence spectra of FAM-DNA responding to  $5 \mu\text{g mL}^{-1}$  Fe-N-C.

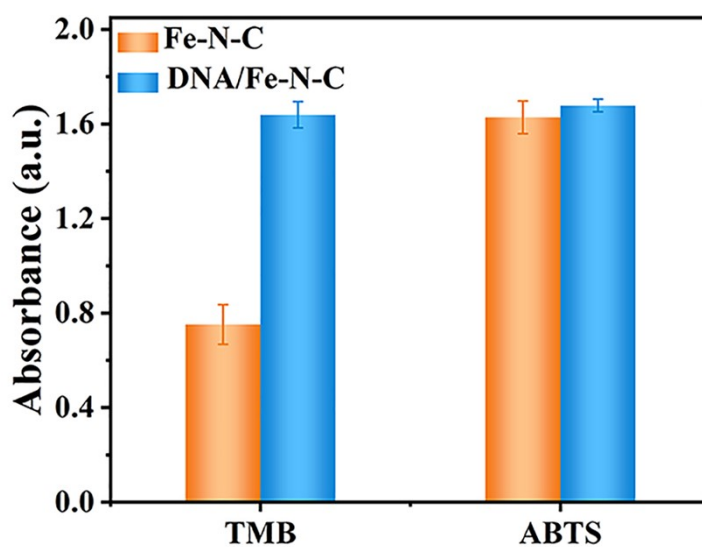

**Fig. S6** POD-like activity of Fe-N-C using ABTS, and TMB as peroxidase substrates before and after adding DNA. Absorbance was determined at 652 nm. The error bars are standard deviations obtained from three independent measurements.

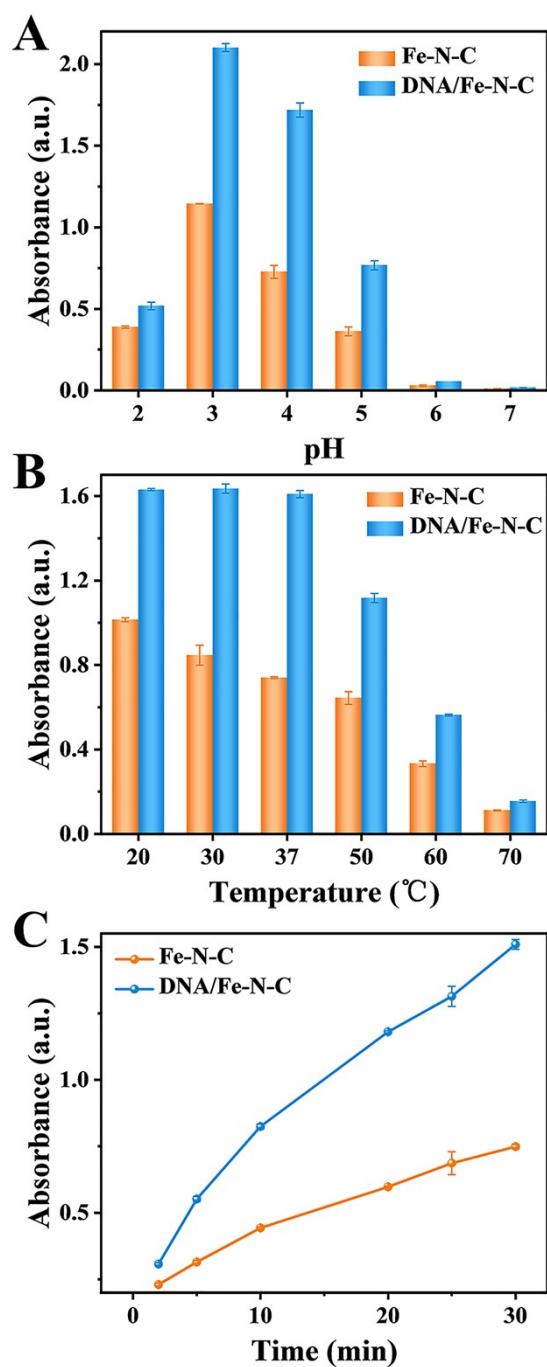

**Fig. S7** The absorbance variation of Fe-N-C and DNA/Fe-N-C depending on pH (A) and temperature (B) and time (C). Absorbance was determined at 652 nm. The error bars are standard deviations obtained from three independent measurements.

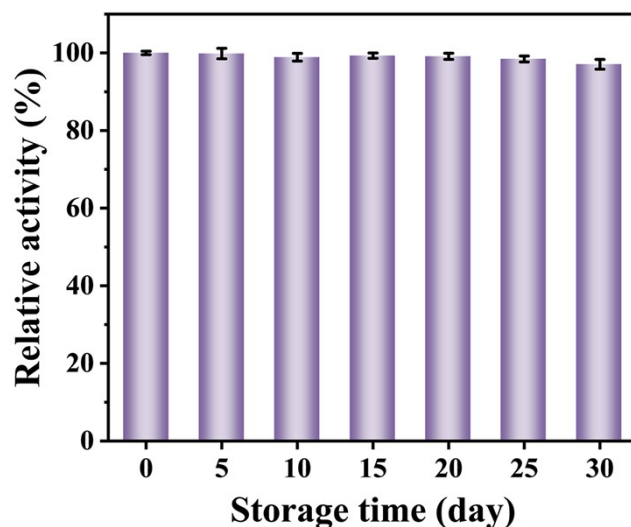

**Fig. S8** Stability tests of DNA/Fe-N-C for 30 days. Condition:  $0.5 \mu\text{g mL}^{-1}$  Fe-N-C, 10 nM DNA, 0.4 mM TMB, 4 mM  $\text{H}_2\text{O}_2$ , HAc-NaAc buffer (20 mM, pH 4.0), a reaction time of 20 minutes and a reaction temperature of  $37^\circ\text{C}$ . The error bars are standard deviations obtained from three independent measurements.

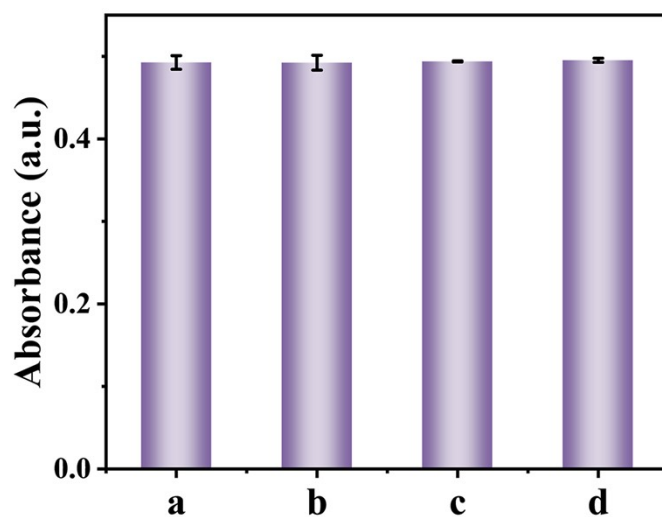

**Fig. S9** The absorbance of DNA/Fe-N-C in different conditions of (a) pH=7; (b) pH=4; (c) pH=7,  $\text{H}_2\text{O}_2$ ; (d) pH=4,  $\text{H}_2\text{O}_2$ . Absorbance was determined at 260 nm. The error bars are standard deviations obtained from three independent measurements.

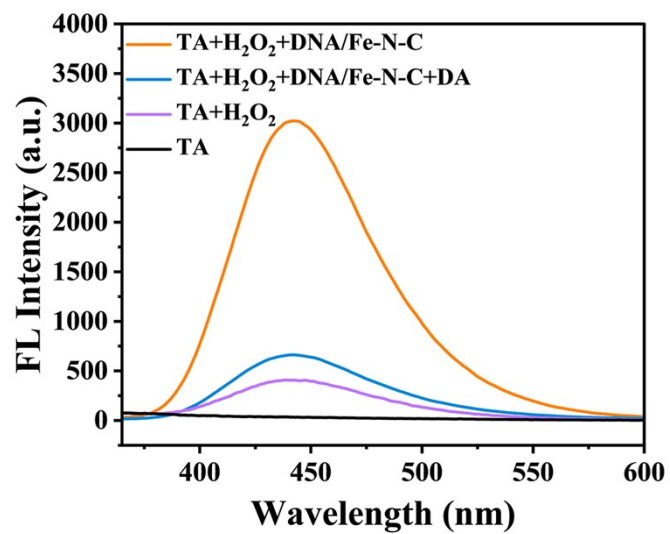

**Fig. S10** Fluorescence spectra were measured under excitation at 315 nm for the interaction of TA with DNA/Fe-N-C, DNA/Fe-N-C+DA, and H<sub>2</sub>O<sub>2</sub>, respectively.

## References

1. L. Gao, J. Zhuang, L. Nie, J. Zhang, Y. Zhang, N. Gu, T. Wang, J. Feng, D. Yang, S. Perrett and X. Yan, *Nat. Nanotechnol.*, 2007, **2**, 577-583.
2. F.-N. Wu, J. Zhu, G.-J. Weng, J.-J. Li and J.-W. Zhao, *ACS Appl. Nano Mater.*, 2021, **4**, 13501-13509.
3. Z. Miao, W. Hou, M. Liu, Y. Zhang and S. Yao, *New J. of Chem.*, 2018, **42**, 1446-1456.
4. A. J. Stewart, J. Hendry and L. Dennany, *Anal. Chem.*, 2015, **87**, 11847-11853.
5. D.-S. Kim, E.-S. Kang, S. Baek, S.-S. Choo, Y.-H. Chung, D. Lee, J. Min and T.-H. Kim, *Sci. Rep.*, 2018, **8**, 14049.
6. Z. Yang, F. Ma, Y. Zhu, S. Chen, C. Wang and X. Lu, *Dalton T.*, 2017, **46**, 11171-11179.
7. M. Razavi, A. Barras, M. Ifires, A. Swaidan, M. Khoshkam, S. Szunerits, M. Kompany-Zareh and R. Boukherroub, *J. Colloid Interf. Sci.*, 2022, **613**, 384-395.
8. M. N. Ivanova, E. D. Grayfer, E. E. Plotnikova, L. S. Kibis, G. Darabdhara, P. K. Boruah, M. R. Das and V. E. Fedorov, *ACS Appl. Mater. Interfaces*, 2019, **11**, 22102-22112.
9. J. Zhu, X. Peng, W. Nie, Y. Wang, J. Gao, W. Wen, J. N. Selvaraj, X. Zhang and S. Wang, *Biosens. Bioelectron.*, 2019, **141**, 111450.
10. P. K. Boruah, P. Borthakur, G. Neog, B. Le Ouay, N. U. Afzal, P. Manna and M. R. Das, *ACS Appl. Nano Mater.*, 2023, **6**, 1667-1677.
11. S. Wang, Z. Hu, Q. Wei, H. Zhang, W. Tang, Y. Sun, H. Duan, Z. Dai, Q. Liu and X. Zheng, *Nano Res.*, 2022, **15**, 4266-4273.
